# Supplementary material for: Histone deacetylase 1 is required for the development of the zebrafish inner ear
Source: PubMed Central journal article supplement (PMC4735278; doi:10.1038/srep16535), 2016-02-01
Supplement: srep16535-s1.pdf [file srep16535-s1.pdf]

## Histone deacetylase 1 is required for the development of the zebrafish inner ear

Yingzi He<sup>1</sup>, Dongmei Tang<sup>1</sup>, Wenyan Li<sup>1</sup>, Renjie Chai<sup>5</sup>, and Huawei Li<sup>1,2,3,4\*</sup>

### Supplemental Figure:

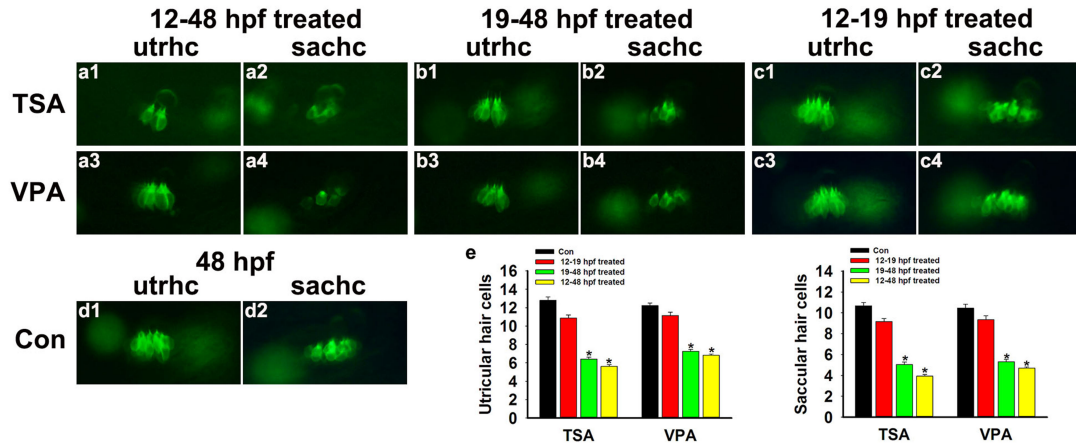

**Supplemental Figure 1. Effect of HDAC inhibitor on hair cell numbers at 48 hpf.** (a-c) *Brn3c:gfp* transgenic zebrafish embryos treated with HDAC inhibitors (12-48 hpf, 19-48 hpf, and 12-19 hpf) and fixed at 48 hpf to examine the numbers of hair cells in the inner ear. (e) Quantification of the numbers of hair cells in the inner ear for each experimental condition. Data are shown as mean  $\pm$  SEM (n = 14–19). \* p < 0.05. utrhc: utricular hair cell; sachc: saccular hair cell.

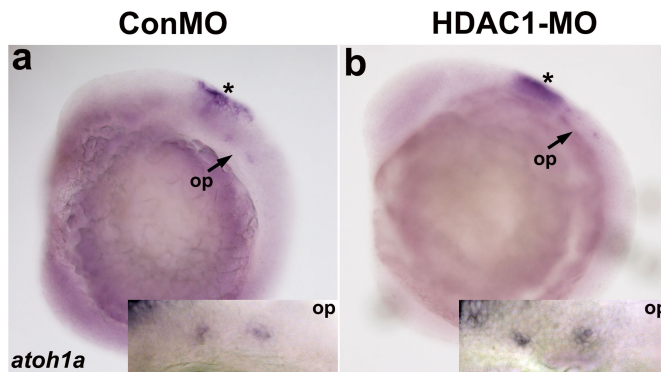

**Supplemental Figure 2. Whole-mount *in situ* hybridizations to *atoh1a*.** (a-b) Lateral views of embryos injected with control morpholino and HDAC1 morpholino and fixed at 14 hpf to examine expression of *atoh1a* in the otic placode. (\*) dorsal hindbrain progenitors. Arrows: otic placode (op).

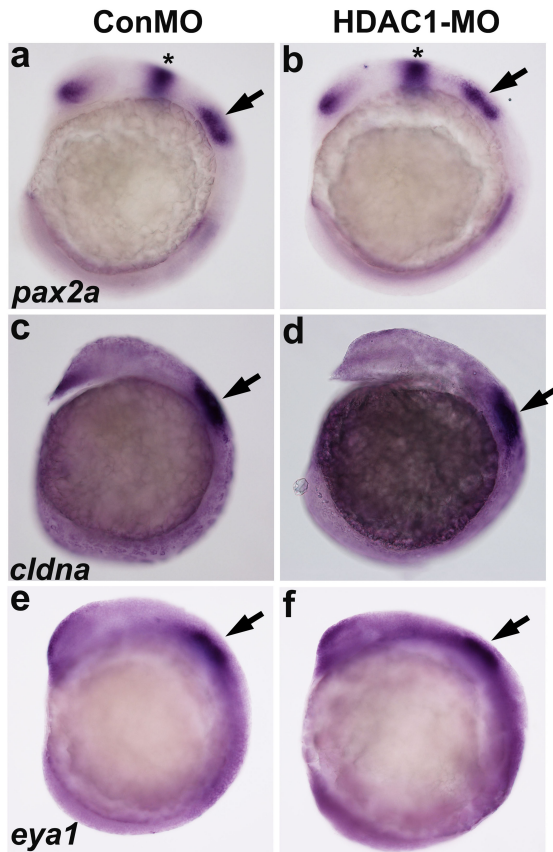

**Supplemental Figure 3. Expression of otic placode markers.** (a-b) Lateral views of embryos injected with control morpholino and HDAC1 morpholino and fixed at 14 hpf to examine expression of *pax2a* (a-b), *cldna* (c-d) and *eya1* (e-f) in the otic placode. The otic placodes are indicated by black arrows. (\*) midbrain-hindbrain boundary.
